# Supplementary material for: Machine-Learning Model for the Prediction of Hypoxaemia during Endoscopic Retrograde Cholangiopancreatography under Monitored Anaesthesia Care
Source: PubMed Central journal article supplement — Yonsei Med J. 2022 Dec 16;64(1):25–34. doi: 10.3349/ymj.2022.0381 (PMC9826962; doi:10.3349/ymj.2022.0381), 2022-12-16
Supplement: ymj-64-25-s001.pdf [file ymj-64-25-s001.pdf]

**Supplementary Table 1. Complete List of Collected Variables**

| Group                             | Type             | Variables [unit]                                                   | Value/Category                                 |
|-----------------------------------|------------------|--------------------------------------------------------------------|------------------------------------------------|
| Patient characteristics           | Continuous       | Age [year-old]                                                     |                                                |
|                                   | Binary           | Sex                                                                | Female<br>Male                                 |
|                                   | Continuous       | Height [cm]                                                        |                                                |
|                                   | Continuous       | Weight [kg]                                                        |                                                |
|                                   | Continuous       | BMI [kg/m <sup>2</sup> ]                                           |                                                |
|                                   | Nominal          | History of smoking                                                 | Never smoker<br>Ex-smoker<br>Current smoker    |
|                                   | Continuous       | Smoking amount [pack-year]                                         |                                                |
|                                   | Binary           | History of drinking                                                | Never-drinker<br>Ever-drinker (including quit) |
|                                   | Ordinal          | ASA classification                                                 | I, II, III, IV                                 |
|                                   | Binary           | Habitual snoring                                                   | Yes<br>No                                      |
|                                   | Binary           | Presence of upper respiratory infection symptoms                   | Yes<br>No                                      |
|                                   | Binary           | O <sub>2</sub> inhalation requires before ERCP                     | Yes<br>No                                      |
|                                   | Continuous       | Pre-ERCP vital sign: SBP [mm Hg]                                   |                                                |
|                                   | Continuous       | Pre-ERCP vital sign: DBP [mm Hg]                                   |                                                |
|                                   | Continuous       | Pre-ERCP vital sign: HR [/min]                                     |                                                |
|                                   | Continuous       | Pre-ERCP vital sign: RR [/min]                                     |                                                |
|                                   | Continuous       | Pre-ERCP vital sign: SpO <sub>2</sub> [%]                          |                                                |
|                                   | Binary           | Decreased oral intake within prior 7 days                          | Yes<br>No                                      |
|                                   | Binary           | Unintended weight loss within prior 1 month                        | Yes<br>No                                      |
|                                   | Binary           | Nutritional risk assessment                                        | High-risk<br>Low-risk                          |
| Procedure-related characteristics | Binary           | Desaturation history in previous sedation endoscopy                | Yes<br>No                                      |
|                                   | Binary           | Altered upper gastrointestinal anatomy                             | Yes<br>No                                      |
|                                   | Binary           | ERCP indication: biliary stone                                     | Yes<br>No                                      |
|                                   | Binary           | ERCP indication: biliary stricture                                 | Yes<br>No                                      |
|                                   | Binary           | Outpatient                                                         | Yes<br>No                                      |
|                                   | Binary           | Emergency                                                          | Yes<br>No                                      |
|                                   | Binary           | Same-session endoscopy with sedation before ERCP                   | Yes<br>No                                      |
|                                   | Continuous       | Duration of same-session endoscopy with sedation before ERCP [min] |                                                |
|                                   | Continuous       | Propofol dose for same-session endoscopy [mg]                      |                                                |
|                                   | Continuous       | Duration of MAC for ERCP [min]                                     |                                                |
|                                   | Continuous       | Propofol dose used during MAC [mg]                                 |                                                |
|                                   | Continuous       | Fentanyl dose used during MAC [mcg]                                |                                                |
|                                   | Laboratory tests | Continuous                                                         | Hb [g/dL]                                      |
| Continuous                        |                  | Hematocrit [%]                                                     |                                                |
| Continuous                        |                  | WBC [10 <sup>3</sup> /μL]                                          |                                                |
| Continuous                        |                  | Absolute neutrophil [%]                                            |                                                |
| Continuous                        |                  | AST [IU/L]                                                         |                                                |
| Continuous                        |                  | ALT [IU/L]                                                         |                                                |
| Continuous                        |                  | BUN [mg/dL]                                                        |                                                |
| Continuous                        |                  | Creatinine [mg/dL]                                                 |                                                |
| Continuous                        |                  | eGFR (CKD-EPI) [mL/min/1.73 m <sup>2</sup> ]                       |                                                |
| Continuous                        |                  | Total Bilirubin [mg/dL]                                            |                                                |
| Continuous                        |                  | Albumin [g/dL]                                                     |                                                |
| Continuous                        |                  | Total Cholesterol [g/dL]                                           |                                                |
| Continuous                        |                  | CRP [mg/L]                                                         |                                                |
| Continuous                        |                  | Prothrombin time [INR]                                             |                                                |
| Comorbid condition                | Binary           | Malignancy                                                         | Yes<br>No                                      |
|                                   | Binary           | Major cardiovascular disease                                       | Yes<br>No                                      |
|                                   | Binary           | Cerebrovascular disease                                            | Yes<br>No                                      |
|                                   | Binary           | Chronic respiratory disease                                        | Yes<br>No                                      |
|                                   | Binary           | Chronic kidney disease (except RRT)                                | Yes<br>No                                      |
|                                   | Binary           | Chronic liver disease (except LC)                                  | Yes<br>No                                      |
|                                   | Binary           | Liver cirrhosis                                                    | Yes<br>No                                      |
|                                   | Binary           | Renal replacement therapy                                          | Yes<br>No                                      |
|                                   | Binary           | Inotropes infusion before ERCP                                     | Yes<br>No                                      |
|                                   | Binary           | Propofol use in same-session endoscopy before ERCP                 | Yes<br>No                                      |
| Pre-procedural medications        | Continuous       | Propofol dosage in same-session endoscopy before ERCP [mg]         |                                                |
|                                   | Binary           | Midazolam use in same-session endoscopy before ERCP                | Yes<br>No                                      |
|                                   | Continuous       | Midazolam dosage in same-session endoscopy before ERCP [mg]        |                                                |
|                                   | Binary           | Prescription of opioids within 7 days                              | Yes<br>No                                      |
|                                   | Binary           | Prescription of opioids within 30 days                             | Yes<br>No                                      |
|                                   | Binary           | Prescription of psychotropics within 7 days                        | Yes<br>No                                      |
|                                   | Binary           | Prescription of psychotropics within 30 days                       | Yes<br>No                                      |

BMI, body mass index; ASA, American Society of Anesthesiologists; ERCP, endoscopic retrograde cholangiopancreatography; SBP, systolic blood pressure; DBP, diastolic blood pressure; HR, heart rate; MAC, monitored anaesthesia care; WBC, white blood cell; AST, aspartate aminotransferase; ALT, alanine aminotransferase; BUN, blood urea nitrogen; CRP, C-reactive protein; INR, international normalized ratio; RRT, renal replacement therapy; LC, liver cirrhosis.

Malignancy-any malignant disease that was active or diagnosed within five years before ERCP; major cardiovascular disease-congestive heart failure, chronic ischemic heart disease, valvular heart disease, presence of cardiac and vascular implants and grafts, and cardiomyopathy; cerebrovascular disease-intracranial hemorrhage, infarction, other cerebrovascular disease, and its sequelae; chronic respiratory disease-chronic obstructive pulmonary disease, asthma, interstitial pulmonary diseases, and pulmonary hypertension; chronic kidney disease (except RRT)-chronic kidney disease of any cause such as diabetic nephropathy or chronic glomerulonephritis, without receiving renal replacement therapy; chronic liver disease (except LC)-chronic hepatitis of any cause, and alcoholic liver disease.
